# Supplementary material for: Controllable growth of WO3@GDY heterointerface for efficient NH3 synthesis
Source: Royal Society of Chemistry journal article supplement (doi:10.1039/d3qm00734k), 2023-01-01
Supplement: d3qm00734k1.pdf [file d3qm00734k1.pdf]

## Supporting Information

### **Controllable growth of WO<sub>3</sub>@GDY heterointerface for efficient NH<sub>3</sub> synthesis**

#### **Determination of ammonia**

Indophenol blue method was used for the detection of NH<sub>3</sub>. Typically, 1 mL electrolyte (10-fold dilution of collected electrolyte) was mixed with 0.1 M NaOH, 125 µL color agent comprising 0.36 M salicylic acid, 0.36M NaOH, and 0.18M potassium sodium tartrate tetrahydrate, 12.5 µL 0.034M sodium nitroprusside and 12.5 µL NaClO/0.75 M NaOH solution. The UV-Vis measurements were performed after 1 h later and recorded with the range of 800 nm to 500 nm.

The ammonia concentration was determined by linear calibration curve of absorbance with serious known concentrations solution using the same indophenol blue method.

#### **<sup>1</sup>H NMR determination of ammonia**

The synthesized ammonia was also determined by <sup>1</sup>H nuclear magnetic resonance (NMR, 400 MHz). Typically, 10 mg maleic acid was first dissolved into the 5 mL electrolytes, and the pH value was adjusted with 4 M H<sub>2</sub>SO<sub>4</sub>. Then 0.5 mL of the above solution was mixed with 0.05 mL DMSO-d<sub>6</sub> and tested by a 400 MHz SB Liquid Bruker Avance NMR spectrometer at room temperature.

#### **Determination of nitrite**

Griess reagent was used as the color-developing agent for the detection of NO<sub>2</sub><sup>-</sup>. Typically, the Griess reagent was composed of 0.8 g N-(1-Naphthyl) dihydrochloride, 0.04 g sulfanilamide, and 2 mL H<sub>3</sub>PO<sub>4</sub> (85%) with 10 mL DI water. 2 mL electrolyte was mixed with 2 mL 0.1 M NaOH, after which mixed with the 40 µL Griess reagent and rested for 10 min at room temperature. UV-Vis spectrophotometer was used to record the absorption spectra in the range of 400-650 nm. And the nitrite concentration was determined by a linear calibration curve of absorbance with serious known concentrations solution using the same Griess test.

#### **Calculation of FEs and Yield**

The FE and yield of NH<sub>3</sub> were calculated as follows:

$$FE_{NH_3} = \frac{8 \times F \times C_{NH_4^+} \times V}{Q} \quad (\text{Equation 1})$$

$$Y_{NH_3} = \frac{C_{NH_4^+} \times V}{t \times S} \quad (\text{Equation 2})$$

where F is the Faradaic constant of 96485 C mol<sup>-1</sup>,  $C_{NH_4^+}$  (μg mL<sup>-1</sup>) is the concentration of ammonia, V is the volume of the cathodic electrolyte (mL), Q (C) is the total charge passing the electrode, t (h) is the electrolysis time, S (cm<sup>2</sup>) is the area of the cathode.

The FE and yield of NO<sub>2</sub><sup>-</sup> were calculated as follows:

$$FE_{NO_2^-} = \frac{2 \times F \times C_{NO_2^-} \times V}{Q} \quad (\text{Equation 3})$$

$$Y_{NO_2^-} = \frac{C_{NO_2^-} \times V}{t \times S} \quad (\text{Equation 4})$$

where F is the Faradaic constant of 96485 C mol<sup>-1</sup>,  $C_{NO_2^-}$  (μg mL<sup>-1</sup>) is the concentration of ammonia which be calculated from the calibration curve, V is the volume of the cathodic electrolyte (mL), Q (C) is the total charge passing the electrode, t (h) is the electrolysis time, S (cm<sup>2</sup>) is the area of the cathode.

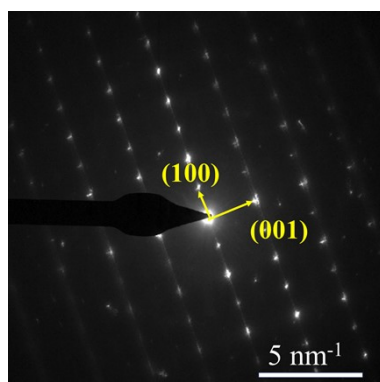

**Figure S1.** The SEAD pattern of WO<sub>3</sub>@GDY.

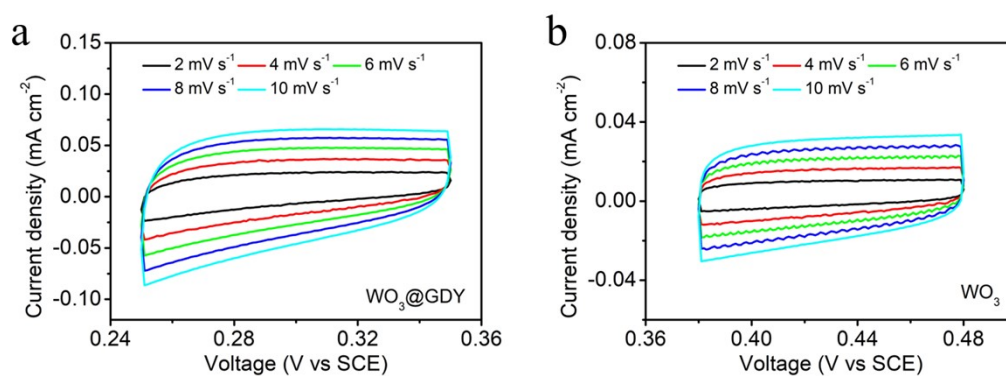

**Figure S2** Cyclic voltammogram curves for a) WO<sub>3</sub>@GDY, b) WO<sub>3</sub> catalysts at different scan rates.

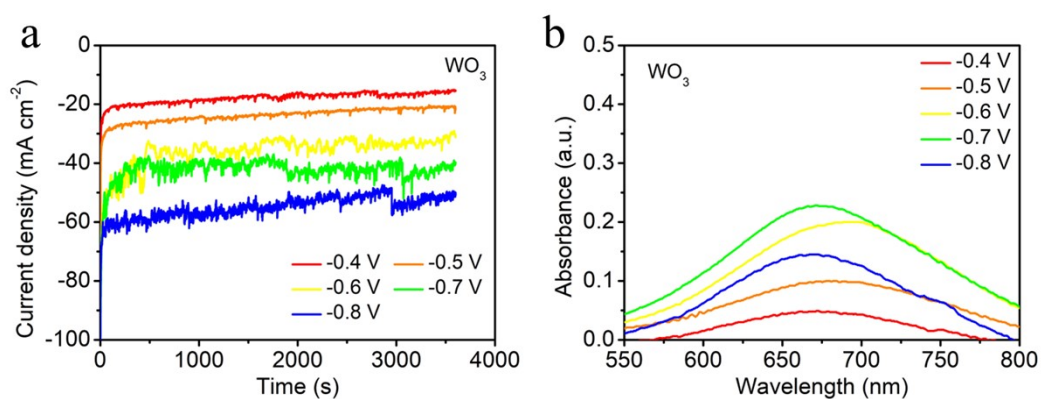

**Figure S3.** a) Chronoamperometry curves of WO<sub>3</sub> at different potentials. b) UV-Vis spectra of WO<sub>3</sub> with different voltages with diluted 10 times electrolyte.

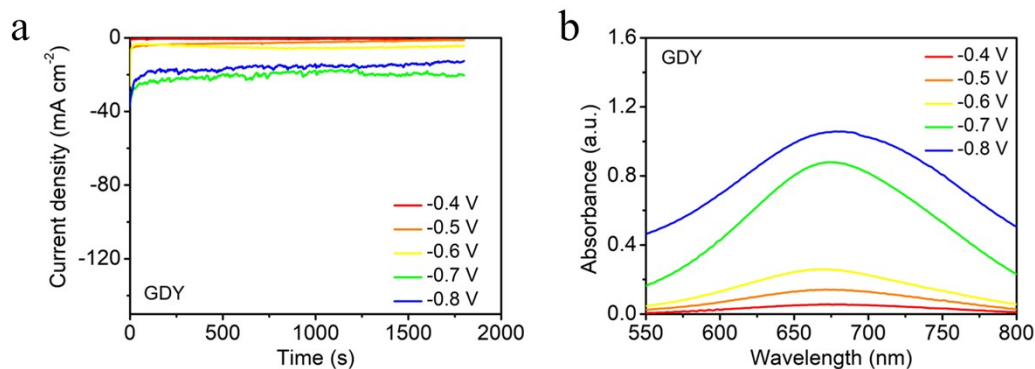

**Figure S4.** a) Chronoamperometry curves of GDY at different potentials. b) UV-Vis spectra of GDY with different voltages.

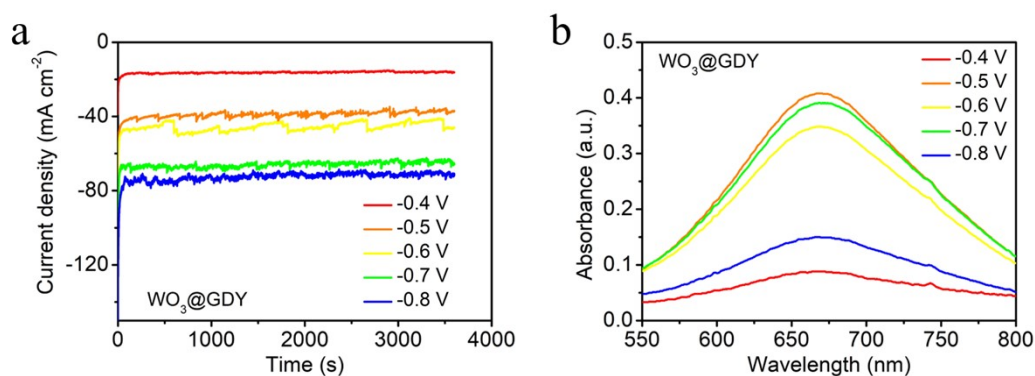

**Figure S5.** a) Chronoamperometry curves of WO<sub>3</sub>@GDY at different potentials. b) UV-Vis spectra of WO<sub>3</sub>@GDY with different voltages with diluted 10 times electrolyte.

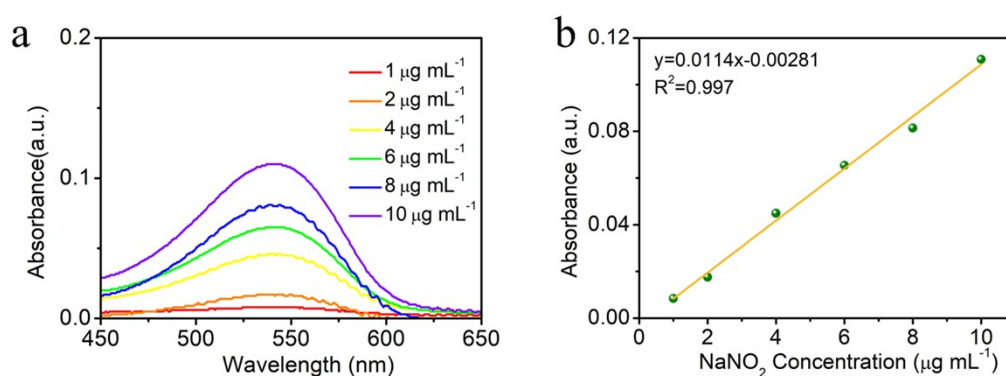

**Figure S6.** a) Absorption spectra of the solutions containing different known NO<sub>2</sub><sup>-</sup> concentrations. b) The corresponding linear relationship between the absorbance at 540 nm and the NO<sub>2</sub><sup>-</sup> concentration.

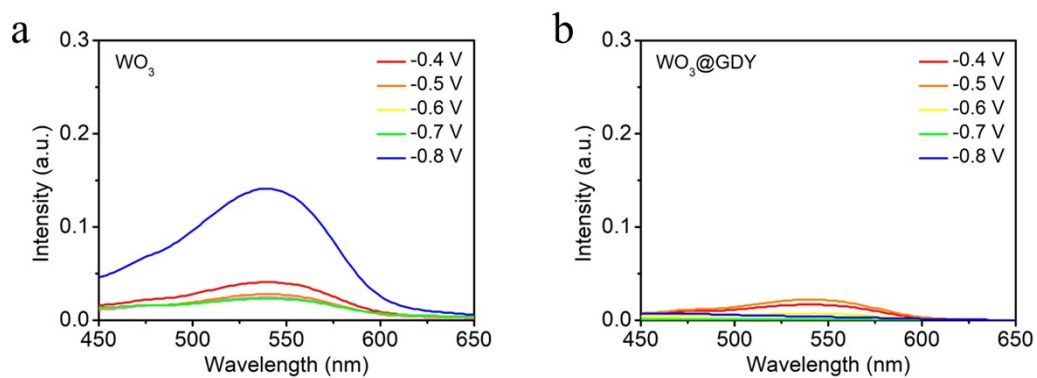

**Figure S7.** Absorption spectra of the electrolyte solutions at different potentials for detecting  $\text{NO}_2^-$  for a)  $\text{WO}_3$  and b)  $\text{WO}_3@\text{GDY}$ .

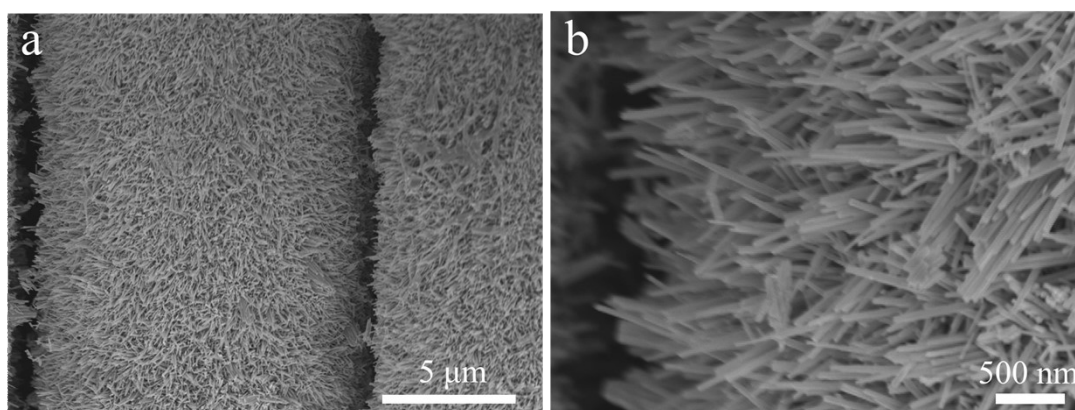

**Figure S8.** Low and high magnification SEM images of  $\text{WO}_3@\text{GDY}$  after continuous electrolysis for 20 hours.

**Table S1.** Comparison of the electrocatalytic NtRR performance under acidic conditions.

| Catalyst                 | $\text{FE}_{(\text{NH}_3)}$ | $\text{Y}_{(\text{NH}_3)}$                 | Electrolyte                                            | Ref.      |
|--------------------------|-----------------------------|--------------------------------------------|--------------------------------------------------------|-----------|
| $\text{WO}_3@\text{GDY}$ | 85.4                        | $2582.6 \mu\text{g h}^{-1} \text{cm}^{-2}$ | 0.1 M HCl+ 0.1 M $\text{KNO}_3$                        | This work |
| CuO                      | 80                          | $162 \mu\text{mol cm}^{-2} \text{h}^{-1}$  | 0.05 M $\text{KNO}_3$ + 0.05 M $\text{H}_2\text{SO}_4$ | 1         |
| Ti                       | 82                          | -                                          | 0.1 M $\text{KNO}_3$ +0.3 M $\text{KNO}_3$             | 2         |

|          |      |                                                      |                                                                |   |
|----------|------|------------------------------------------------------|----------------------------------------------------------------|---|
| Ir NTs   | 84.7 | 921 $\mu\text{g h}^{-1} \text{mg}_{\text{cat}}^{-1}$ | 0.1 M HClO <sub>4</sub> + 1 M NaNO <sub>3</sub>                | 3 |
| Cu-PTCDA | 8    | 485.7 $\mu\text{g h}^{-1} \text{mg}^{-1}$            | 0.001 M HCl + 0.5 g L <sup>-1</sup> KNO <sub>3</sub>           | 4 |
| PA-RhCu  | 93.7 | 2.40 $\text{mg h}^{-1} \text{mg}_{\text{cat}}^{-1}$  | 0.1 M HClO <sub>4</sub> + 0.05 M KNO <sub>3</sub> <sup>1</sup> | 5 |

## Reference

1. R. Daiyan, T. Tran-Phu, P. Kumar, K. Iputera, Z. Tong, J. Leverett, M. H. A. Khan, A. Asghar Esmailpour, A. Jalili, M. Lim, A. Tricoli, R.-S. Liu, X. Lu, E. Lovell and R. Amal, Nitrate reduction to ammonium: from CuO defect engineering to waste NO<sub>x</sub>-to-NH<sub>3</sub> economic feasibility, *Energy & Environmental Science*, 2021, **14**, 3588-3598.
2. J. M. McEnaney, S. J. Blair, A. C. Nielander, J. A. Schwalbe, D. M. Koshy, M. Cargnello and T. F. Jaramillo, Electrolyte Engineering for Efficient Electrochemical Nitrate Reduction to Ammonia on a Titanium Electrode, *ACS Sustainable Chemistry & Engineering*, 2020, **8**, 2672-2681.
3. J.-Y. Zhu, Q. Xue, Y.-Y. Xue, Y. Ding, F.-M. Li, P. Jin, P. Chen and Y. Chen, Iridium Nanotubes as Bifunctional Electrocatalysts for Oxygen Evolution and Nitrate Reduction Reactions, *ACS Applied Materials & Interfaces*, 2020, **12**, 14064-14070.
4. G.-F. Chen, Y. Yuan, H. Jiang, S.-Y. Ren, L.-X. Ding, L. Ma, T. Wu, J. Lu and H. Wang, Electrochemical reduction of nitrate to ammonia via direct eight-electron transfer using a copper–molecular solid catalyst, *Nature Energy*, 2020, **5**, 605-613.
5. Z. X. Ge, T. J. Wang, Y. Ding, S. B. Yin, F. M. Li, P. Chen and Y. Chen, Interfacial Engineering Enhances the Electroactivity of Frame-Like Concave RhCu Bimetallic Nanocubes for Nitrate Reduction, *Advanced Energy Materials*, 2022, **12**, 2103916.
